# Supplementary material for: Comorbidities and COPD severity in a clinic-based cohort
Source: Springer Nature journal article supplement (doi:10.1186/s12890-018-0684-7), 2018-07-16
Supplement: MOESM1 [file 15956620]

**Questions**

**Items**

|                                  |                                                                                                                             |
|----------------------------------|-----------------------------------------------------------------------------------------------------------------------------|
| Date of visit                    |                                                                                                                             |
| ID number                        |                                                                                                                             |
| gender                           |                                                                                                                             |
| Date of birth                    |                                                                                                                             |
| Adress (postal code)             | Outside France, Country                                                                                                     |
| Occupation                       | 1/Farmers 2/craftsmen<br>3/managers 4/intermediate occupation 5/employees<br>6/workers 7/retired 8/no professional activity |
| Habits                           | home / institution                                                                                                          |
| Location of birth                | City/department/country                                                                                                     |
| Family status                    | couple/unmarried/divorced/ widow                                                                                            |
| Social Insurance                 |                                                                                                                             |
| Adressed by                      |                                                                                                                             |
| <b>CLINIC</b>                    |                                                                                                                             |
| Height/ Weight                   | (cm)/(Kg)                                                                                                                   |
| Blood pressure                   | (max/min mmHg)                                                                                                              |
| Pulse                            | (nb pulsations/min)                                                                                                         |
| <b>Risk factor</b>               |                                                                                                                             |
| Smoking <i>Number pack years</i> | yes/no if yes, past smoker or active smoker                                                                                 |
| Minimal advice                   | Yes/no                                                                                                                      |
| e-cigarette                      | Yes/no                                                                                                                      |
| <b>Environment</b>               |                                                                                                                             |
| Job exposure                     |                                                                                                                             |
| Genetic predisposition           | alpha 1 antitrypsin deficiency                                                                                              |
| <b>Clinical examination</b>      |                                                                                                                             |
| Purpose of the visit*            |                                                                                                                             |
| Year of first symptoms           |                                                                                                                             |
| Cough*                           | Yes/no                                                                                                                      |
| Phlegm*                          | Yes/no                                                                                                                      |
| <b>Dyspnea/MRC</b>               |                                                                                                                             |
| Chest pain *                     | Yes/no                                                                                                                      |
| Exacerbations*                   | (nb/year)                                                                                                                   |
| <b>Daily time of walking</b>     |                                                                                                                             |
|                                  | (min)                                                                                                                       |
| <b>Pulmonary examination</b>     |                                                                                                                             |
| <b>Spirometry</b>                |                                                                                                                             |
| FEV1 (post bronchodilatator)*    | (L)                                                                                                                         |
| LVC or FVC*                      | (L)                                                                                                                         |
| TPC                              | (% predicted)                                                                                                               |

|                    |               |
|--------------------|---------------|
| RV                 | (% predicted) |
| TLCO/VA            | (% predicted) |
| IC                 | (% predicted) |
| <b>Blood gases</b> |               |
| SaO2               | (%)           |
| PaO2               | (mmHg)        |
| PaCO2              | (mmHg)        |

**Exercise**

6 minutes walking test (meters)

**COMORBIDITIES**

OAS Yes/no

Asthma Yes/no

bronchiectasis Yes/no

Cancer Yes/no

**Cardio-vascular**

Hypertension Yes/no

Ischemic cardiopathy Yes/no

Heart rhythm disorder Yes/no

Left cardiac insufficiency Yes/no

Atheroma Yes/no

Vascular Stroke Yes/no

Pulmonary hypertension Yes/no

Arteriopathy Yes/no

**METABOLIC**

Diabetes Yes/no

Dyslipidemia Yes/no

Metabolic syndrome Yes/no

Denutrition Yes/no

Osteoporosis Yes/no

Depression Yes/no

Anxiety Yes/no

Rhinitis/rhinosinusitis Yes/no

**Treatment**

**COPD medication** Link with VIDAL database

Compliance Good/moderate/low

Oxygen therapy Long term /Nocturnal /during walking/short term

Non invasive ventilation Yes/no

---

|                                     |               |
|-------------------------------------|---------------|
| <b>Continue Positive Pressure</b>   | <b>Yes/no</b> |
| <b>Smoking cessation management</b> | <b>Yes/no</b> |
| <b>NRT use</b>                      | <b>Yes/no</b> |
| <b>Physiotherapy breathing</b>      | <b>Yes/no</b> |
| <b>Therapeutic education</b>        | <b>Yes/no</b> |
| <b>Respiratory rehabilitation</b>   | <b>Yes/no</b> |

**PREVENTION**

|                                                |                              |
|------------------------------------------------|------------------------------|
| <b>Influenza and pneumococcal Vaccinations</b> | <b>Yes/no</b>                |
| <b>Psychological support</b>                   | <b>Yes/no</b>                |
| <b>Exacerbations : action plan</b>             | <b>Yes/no ; written/oral</b> |
| <b>Physical activity</b>                       | <b>Yes/no</b>                |

---

|                   |                                             |
|-------------------|---------------------------------------------|
| <b>Next visit</b> | <b>15 days/1month/3months/6months/1year</b> |
|-------------------|---------------------------------------------|

---
